# Supplementary material for: Structural elucidation of NASICON (Na3Al2P3O12) based glass electrolyte materials: effective influence of boron and gallium
Source: Royal Society of Chemistry journal article supplement (doi:10.1039/c8ra01676c), 2018-01-01
Supplement: c8ra01676c1.pdf [file c8ra01676c1.pdf]

## Structural Elucidation of NASICON ( $\text{Na}_3\text{Al}_2\text{P}_3\text{O}_{12}$ ) Based Glass Electrolyte Materials: Effective Influence of Boron and Gallium

Amarnath R. Allu<sup>a,#,\*</sup>, Sathravada Balaji<sup>a,#</sup>, Kavya I<sup>b</sup>, Chaithanya Hareendran<sup>b</sup>, T.G.  
Ajithkumar<sup>b</sup>, Kaushik Biswas<sup>a</sup>, K. Annapurna<sup>a,\*</sup>

<sup>a</sup> Glass division, CSIR-Central Glass and Ceramic Research Institute, 700032, Kolkata, India

<sup>b</sup> Central NMR Facility, CSIR-National Chemical Laboratory, 411008, Pune, India

\*: Corresponding author Tel.: +91-33-23223421; Fax: +91-33-24730957.

E-mail address: [aareddy@cgcric.res.in](mailto:aareddy@cgcric.res.in); (A. R. Allu)

[annapurnak@cgcric.res.in](mailto:annapurnak@cgcric.res.in); (K. Annapurna)

# These authors contributed equally

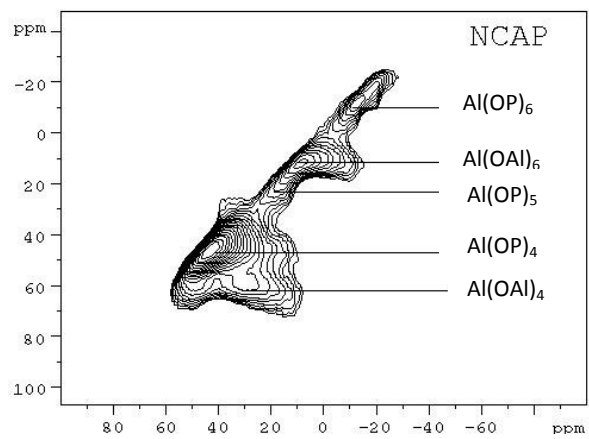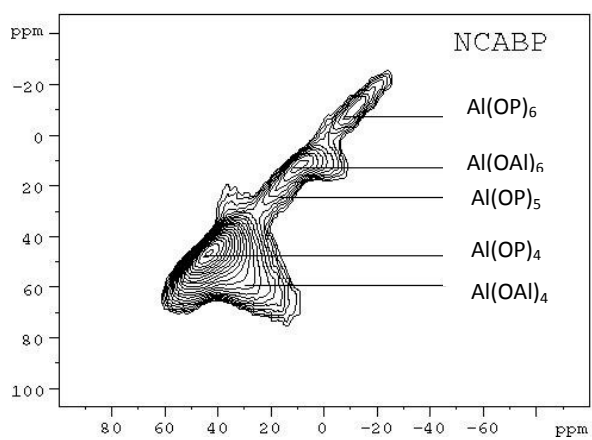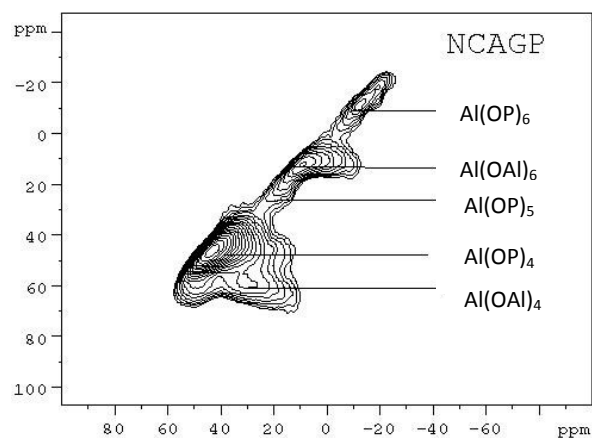

Figure S1.  $^{27}\text{Al}$  3Q MAS NMR spectra.

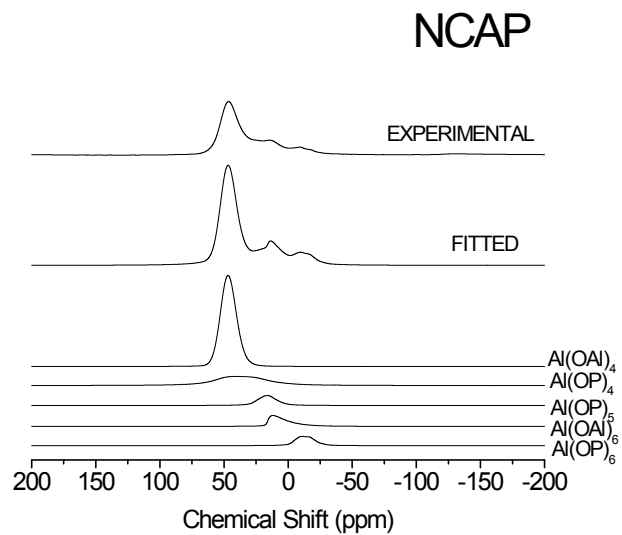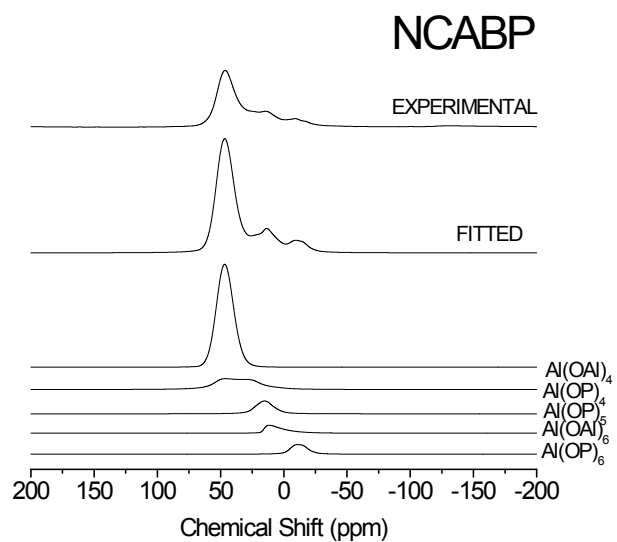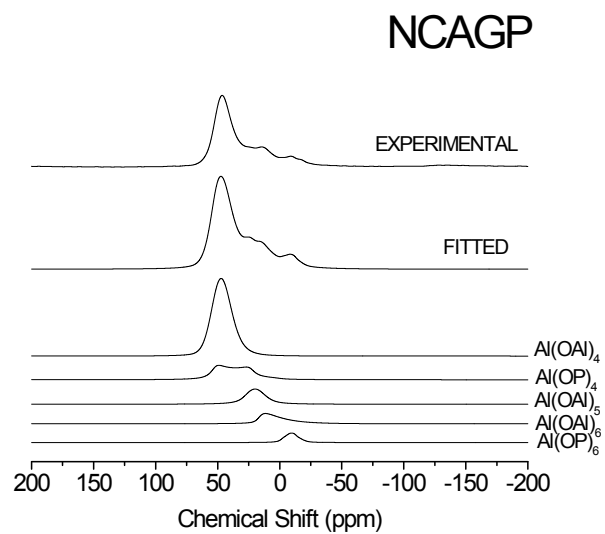

Figure S2: Deconvolution of  $^{27}\text{Al}$  MAS-NMR spectra.

## Impedance analysis:

Equivalent Circuit:

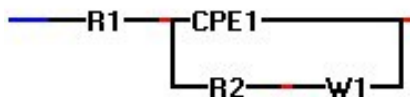

R1: Series resistance

R2: Charge transfer resistance

W1: Warburg resistance

CPE1: Constant Phase Element, used to describe the double layer capacitance at Ag/electrolyte(NASICON glass) interface (for  $n=1$ , CPE1 describes an ideal capacitor and for  $n=0$ , CPE1 describes an ideal resistor)

**Table S1:** Fitted values for the equivalent circuit.

|       | R1 (Ohm) | R2 (Ohm) | W1 (Ohm) | CPE1 (Farad) | n      |
|-------|----------|----------|----------|--------------|--------|
| NCAP  | 73106    | 7.48 e6  | 1.81 e7  | 4.29 e-11    | 0.7758 |
| NCAGP | 201330   | 1.03 e7  | 2.15 e7  | 4.42 e-11    | 0.7761 |
| NCABP | 26966    | 1.60 e7  | 1.23 e7  | 4.26 e-11    | 0.7791 |
